# Supplementary material
Source: ML conference proceedings conference paper supplement (https://openaccess.thecvf.com/content/WACV2024/html/Nguyen_Debiasing_Calibrating_and_WACV_2024_paper.html)
Supplement: Supplementary file 1 [file Nguyen_Debiasing_Calibrating_and_WACV_2024_supplemental.pdf]

## A. Hyperparameter setting

We report the detailed hyperparameters setting with a specific model for each dataset in Table 8 and Table 9.

### A.1. Setup for Table 2

For classic CV tasks, we follow the setup from the original papers using USB codebase. The details setup hyperparameters are listed in Table 8.

### A.2. Setup for Table 7

Pre-trained ViT models [18] are used for CV tasks in USB. For TissueMNIST, CIFAR-100, and Euro-SAT, we use ViT-Tiny and ViT-Small with a patch size of 4 and an image size of 32, while for Semi-Aves, we use ViT-Small with a patch size of 16 and an image size of 224. For STL10, which is a subset of ImageNet, we use unsupervised pre-training MAE [21] of ViT-Base with an image size of 96 to prevent cheating.

Following USB CV tasks, we adopt layer-wise learning rate decay as in [31]. The cosine annealing scheduler is used with a total step of 204,800 and warm-up for 5,120 steps. Both labeled and unlabeled batch sizes are set to 16, and other algorithm-related hyper-parameters remain the same as in the original papers.

## B. ImageNet detailed results

Table 10 shows the detailed results from Table 3. EPASS achieves 75.3% of top-1 accuracy with the same training duration ( $\sim 400$  epochs) on 10% of labels for SimMatch, and 74.1% of top-1 accuracy for CoMatch. These improvements are also noticeable when EPASS is deployed on 1% of labels, achieving 67.4% and 68.6% top-1 accuracy for CoMatch and SimMatch, respectively.

## C. Precision, Recall, F1 and AUC

We further report precision, recall, F1-score, and AUC (area under curve) results on the CIFAR-10/100, SVHN, and STL-10 datasets. As shown in Table 11 and Table 12, EPASS also has the best performance on precision, recall, F1-score, and AUC on all datasets except CIFAR. Especially on the STL-10 dataset, the improvement from EPASS for CoMatch and SimMatch is very noticeable by a large margin.

## D. List of Data Transformations

We report the detailed augmentations used in our method in Table 13. This list of transformations is similar to the original list used in FixMatch [40] and FlexMatch [52].

| Dataset                  | CIFAR-10                                            | CIFAR-100 | STL-10   | SVHN     | ImageNet  |
|--------------------------|-----------------------------------------------------|-----------|----------|----------|-----------|
| Model                    | WRN-28-2                                            | WRN-28-8  | WRN-37-2 | WRN-28-2 | ResNet-50 |
| Weight Decay             | 5e-4                                                | 1e-3      | 5e-4     | 5e-4     | 3e-4      |
| Labeled Batch Size       | 64                                                  |           |          | 128      |           |
| Unlabeled Batch Size     | 448                                                 |           |          | 128      |           |
| Learning Rate            | 0.03                                                |           |          |          |           |
| SGD Momentum             | 0.9                                                 |           |          |          |           |
| EMA Momentum             | 0.999                                               |           |          |          |           |
| Scheduler                | $\eta = \eta_0 \cos\left(\frac{7\pi k}{16K}\right)$ |           |          |          |           |
| Weak Augmentation        | Random Crop, Random Horizontal Flip                 |           |          |          |           |
| Strong Augmentation      | RandAugment [16]                                    |           |          |          |           |
| Unsupervised Loss Weight | 1                                                   |           |          |          |           |

Table 8. Dataset-wise hyperparameters for classic CV tasks.

| Dataset                 | CIFAR-100                                           | STL-10       | Euro-SAT    | TissueMNIST | Semi-Aves     |
|-------------------------|-----------------------------------------------------|--------------|-------------|-------------|---------------|
| Image Size              | 32                                                  | 96           | 32          | 32          | 224           |
| Model                   | ViT-S-P4-32                                         | ViT-B-P16-96 | ViT-S-P4-32 | ViT-T-P4-32 | ViT-S-P16-224 |
| Weight Decay            | 5e-4                                                |              |             |             |               |
| Labeled Batch Size      | 16                                                  |              |             |             |               |
| Unlabeled Batch Size    | 16                                                  |              |             |             |               |
| Learning Rate           | 5e-4                                                | 1e-4         | 5e-5        | 5e-5        | 1e-3          |
| Layer Decay Rate        | 0.5                                                 | 0.95         | 1.0         | 0.95        | 0.65          |
| Scheduler               | $\eta = \eta_0 \cos\left(\frac{7\pi k}{16K}\right)$ |              |             |             |               |
| Model EMA Momentum      | 0.0                                                 |              |             |             |               |
| Prediction EMA Momentum | 0.999                                               |              |             |             |               |
| Weak Augmentation       | Random Crop, Random Horizontal Flip                 |              |             |             |               |
| Strong Augmentation     | RandAugment [16]                                    |              |             |             |               |

Table 9. Dataset-wise hyperparameters for USB [42] CV tasks.

| Self-supervised Pre-training | Method              | Epochs | Parameters (train/test) | 1% labels   |             | 10% labels  |             |
|------------------------------|---------------------|--------|-------------------------|-------------|-------------|-------------|-------------|
|                              |                     |        |                         | top-1       | top-5       | top-1       | top-5       |
| None                         | FixMatch            | ~ 300  | 25.6M/25.6M             | -           | -           | 71.5        | 89.1        |
|                              | CoMatch [30]        | ~ 400  | 30.0M/25.6M             | 66.0        | 86.4        | 73.6        | 91.6        |
|                              | SimMatch [56]       | ~ 400  | 30.0M/25.6M             | 67.2        | 87.1        | 74.4        | 91.6        |
| MoCo V2 [13]                 | CoMatch [30]        | ~ 1200 | 30.0M/25.6M             | 67.1        | 87.1        | 73.7        | 91.4        |
| MoCo-EMAN [8]                | FixMatch-EMAN [8]   | ~ 1100 | 30.0M/25.6M             | 63.0        | 83.4        | 74.0        | 90.9        |
| <b>None</b>                  | <b>[30] + EPASS</b> | ~ 400  | 30.0M/25.6M             | <b>67.4</b> | <b>87.3</b> | 74.1        | 91.5        |
| <b>None</b>                  | <b>[56] + EPASS</b> | ~ 400  | 30.0M/25.6M             | <b>68.6</b> | <b>87.6</b> | <b>75.3</b> | <b>92.6</b> |

Table 10. Accuracy results on ImageNet with 1% and 10% labeled examples.

| Dataset      | CIFAR-10 (40) |               |               | CIFAR-100 (400) |               |               |
|--------------|---------------|---------------|---------------|-----------------|---------------|---------------|
| Criteria     | Precision     | Recall        | F1 Score      | Precision       | Recall        | F1 Score      |
| UDA          | 0.9333        | 0.9311        | 0.9302        | 0.5813          | 0.5484        | 0.5087        |
| FixMatch     | 0.9351        | 0.9307        | 0.9297        | 0.5574          | 0.5430        | 0.4946        |
| Dash         | 0.8847        | 0.8486        | 0.8210        | 0.5833          | 0.5649        | 0.5215        |
| FlexMatch    | 0.9505        | 0.9507        | 0.9505        | 0.6135          | 0.6193        | 0.6107        |
| FreeMatch    | <b>0.9510</b> | <b>0.9512</b> | <b>0.9510</b> | <b>0.6243</b>   | <b>0.6261</b> | <b>0.6137</b> |
| CoMatch      | 0.9441        | 0.9445        | 0.9441        | 0.4543          | 0.3979        | 0.4067        |
| SimMatch     | 0.9434        | 0.9438        | 0.9434        | 0.5101          | 0.5133        | 0.5017        |
| [30] + EPASS | 0.9447        | 0.9450        | 0.9447        | 0.5588          | 0.4927        | 0.4978        |
| [56] + EPASS | 0.9493        | 0.9494        | 0.9491        | 0.6084          | 0.6061        | 0.6003        |

Table 11. Precision, recall, F1-score and AUC results on CIFAR-10/100.

| Dataset      | SVHN (40)     |               |               | STL-10 (40)   |               |               |
|--------------|---------------|---------------|---------------|---------------|---------------|---------------|
| Criteria     | Precision     | Recall        | F1 Score      | Precision     | Recall        | F1 Score      |
| UDA          | 0.9781        | 0.9777        | 0.9780        | 0.6385        | 0.5319        | 0.4765        |
| FixMatch     | 0.9731        | 0.9706        | 0.9716        | 0.6590        | 0.5830        | 0.5405        |
| Dash         | 0.9779        | 0.9777        | 0.9778        | 0.8117        | 0.6020        | 0.5448        |
| FlexMatch    | 0.9566        | 0.9691        | 0.9625        | 0.6403        | 0.6755        | 0.6518        |
| FreeMatch    | 0.9551        | 0.9665        | 0.9605        | 0.8489        | 0.8439        | 0.8354        |
| CoMatch      | 0.9542        | 0.9677        | 0.9605        | -             | -             | -             |
| SimMatch     | 0.9718        | 0.9782        | 0.9748        | -             | -             | -             |
| [30] + EPASS | 0.9647        | 0.9724        | 0.9684        | <b>0.9100</b> | <b>0.9085</b> | <b>0.9075</b> |
| [56] + EPASS | <b>0.9782</b> | <b>0.9778</b> | <b>0.9780</b> | 0.8026        | 0.8029        | 0.7977        |

Table 12. Precision, recall, F1-score and AUC results on SVHN and STL-10.

| Transformation | Description                                                                                                                     | Parameter | Range        |
|----------------|---------------------------------------------------------------------------------------------------------------------------------|-----------|--------------|
| Autocontrast   | Maximizes the image contrast by setting the darkest (lightest) pixel to black (white).                                          |           |              |
| Brightness     | Adjusts the brightness of the image. $B = 0$ returns a black image, $B = 1$ returns the original image.                         | $B$       | [0.05, 0.95] |
| Color          | Adjusts the color balance of the image like in a TV. $C = 0$ returns a black & white image, $C = 1$ returns the original image. | $C$       | [0.05, 0.95] |
| Contrast       | Controls the contrast of the image. A $C = 0$ returns a gray image, $C = 1$ returns the original image.                         | $C$       | [0.05, 0.95] |
| Equalize       | Equalizes the image histogram.                                                                                                  |           |              |
| Identity       | Returns the original image.                                                                                                     |           |              |
| Posterize      | Reduces each pixel to $B$ bits.                                                                                                 | $B$       | [4, 8]       |
| Rotate         | Rotates the image by $\theta$ degrees.                                                                                          | $\theta$  | [-30, 30]    |
| Sharpness      | Adjusts the sharpness of the image, where $S = 0$ returns a blurred image, and $S = 1$ returns the original image.              | $S$       | [0.05, 0.95] |
| Shear_x        | Shears the image along the horizontal axis with rate $R$ .                                                                      | $R$       | [-0.3, 0.3]  |
| Shear_y        | Shears the image along the vertical axis with rate $R$ .                                                                        | $R$       | [-0.3, 0.3]  |
| Solarize       | Inverts all pixels above a threshold value of $T$ .                                                                             | $T$       | [0, 1]       |
| Translate_x    | Translates the image horizontally by $(\lambda \times \text{image width})$ pixels.                                              | $\lambda$ | [-0.3, 0.3]  |
| Translate_y    | Translates the image vertically by $(\lambda \times \text{image height})$ pixels.                                               | $\lambda$ | [-0.3, 0.3]  |

Table 13. List of transformations used in RandAugment

## E. Qualitative Analysis

We present the T-SNE visualization of features on STL-10 test dataset with 40-label split in Figure 5,6. The visualization is using trained models from SimMatch and CoMatch with EPASS.

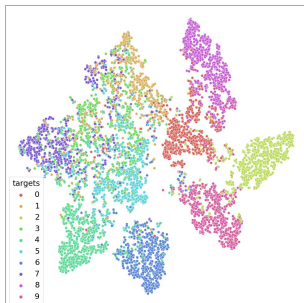

Figure 5. T-SNE visualization of SimMatch + EPASS features on STL-10 dataset with 40-label split.

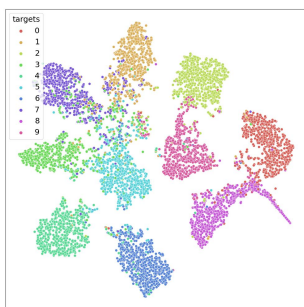

Figure 6. T-SNE visualization of CoMatch + EPASS features on STL-10 dataset with 40-label split.

We also illustrate the T-SNE visualization of features on SVHN test dataset and CIFAR-10 test dataset with 40-label split in Figure 7,8 and Figure 9,10, respectively.

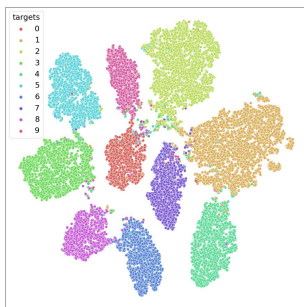

Figure 7. T-SNE visualization of SimMatch + EPASS features on SVHN dataset with 40-label split.

Furthermore, we sketch the T-SNE visualization for the embeddings on those three datasets, as shown in Figures 11,

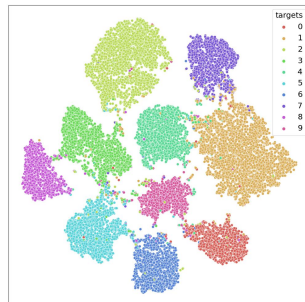

Figure 8. T-SNE visualization of CoMatch + EPASS features on SVHN dataset with 40-label split.

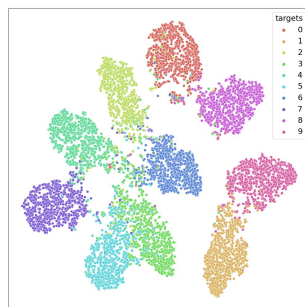

Figure 9. T-SNE visualization of SimMatch + EPASS features on CIFAR-10 dataset with 40-label split.

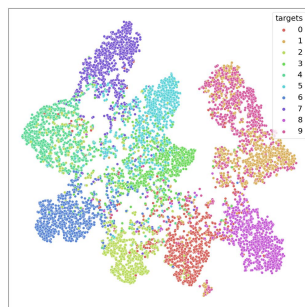

Figure 10. T-SNE visualization of CoMatch + EPASS features on CIFAR-10 dataset with 40-label split.

12, 13, 14, 15, 16, respectively.

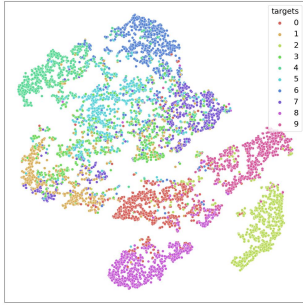

Figure 11. T-SNE visualization of SimMatch + EPASS embeddings on STL-10 dataset with 40-label split.

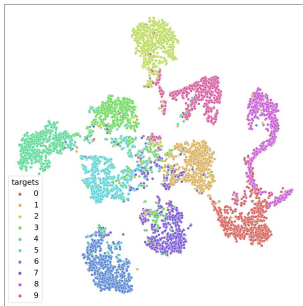

Figure 12. T-SNE visualization of CoMatch + EPASS embeddings on STL-10 dataset with 40-label split.

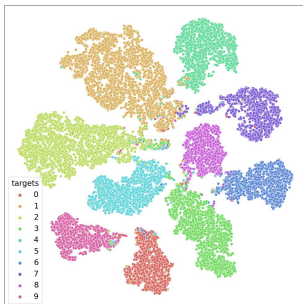

Figure 13. T-SNE visualization of SimMatch + EPASS embeddings on SVHN dataset with 40-label split.

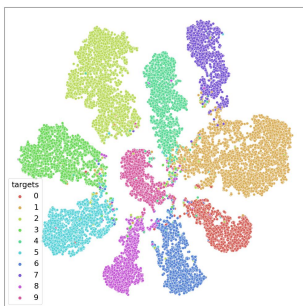

Figure 14. T-SNE visualization of CoMatch + EPASS embeddings on SVHN dataset with 40-label split.

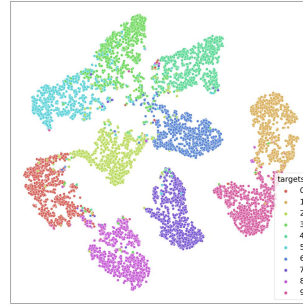

Figure 15. T-SNE visualization of SimMatch + EPASS embeddings on CIFAR-10 dataset with 40-label split.

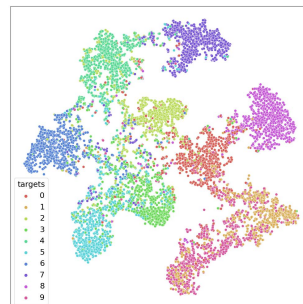

Figure 16. T-SNE visualization of CoMatch + EPASS embeddings on CIFAR-10 dataset with 40-label split.

## F. Algorithm

We apply EPASS to recent state-of-the-art SSL (CoMatch [30] and SimMatch [56]) and self-supervised learning (MoCo [22]). Applying EPASS to these methods only requires a few lines of code as shown in Algorithm 1.

```
Input: Encoder  $f$ , projector  $g_k$  and the number of projectors  $K$ .
1 for  $b = 1$  to  $\mu B$  do
2   Generate prediction distribution as a conventional pipeline by forward propagation.
3   for  $k = 1$  to  $K$  do
4      $z_{b,k} = g_k(f_b)$  // Compute embeddings by different projectors.
5   end
6    $z_b = \text{norm}\left(\frac{\sum_{k=1}^K z_{b,k}}{K}\right)$  // Compute the aggregated embeddings.
7   Calculate the overall training objective.
8   Optimize the model and update the memory bank.
9 end
Output: The optimized model  $f_s$ ,  $h_s$  and  $g_{s,k}$ .
```

**Algorithm 1:** EPASS
